# Supplementary material
Source: Springer Nature journal article supplement (https://www.springermedizin.de/resource/supplementary/12963_2010_132_MOESM3_ESM.pdf/9572724)

**Maximum limit approach**

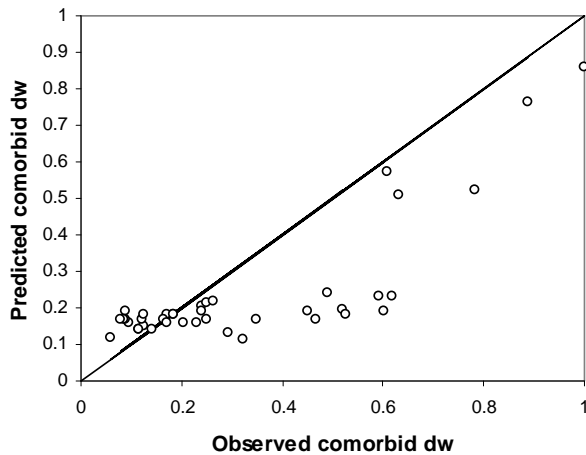

**Additive approach**

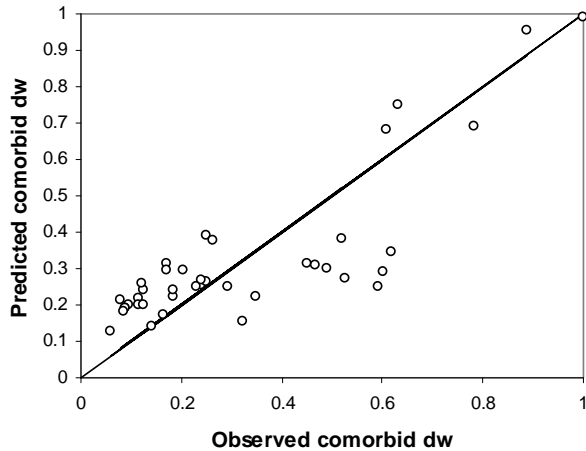

**Multiplicative approach**

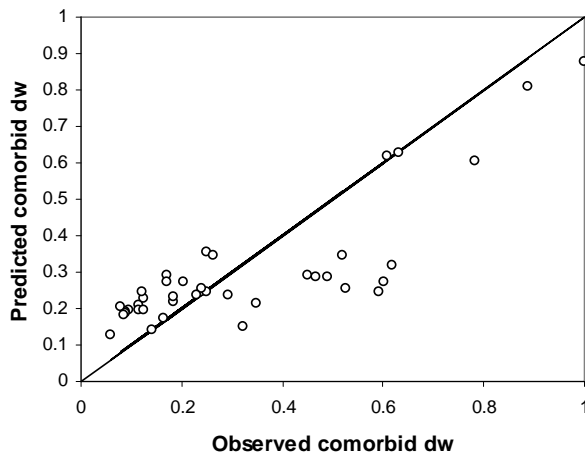

Supplement: MOESM3 [file 9572724]
